# Supplementary material for: Cognitive processing of orientation discrimination in anisometropic amblyopia
Source: PLoS One. 2017 Oct 12;12(10):e0186221. doi: 10.1371/journal.pone.0186221 (PMC5638445; doi:10.1371/journal.pone.0186221)
Supplement: S3 Data — Group 1: Anisometropic Amblyopes; Group 2: Normal Controls; AE: Amblyopic Eye; FE: Fellow eye; BA: Binoculus in Amblyopia; ND: Non-dominant Eye; DE: Dominant Eye; BC: Binoculus in Control; F: Frontal Electrode; C: Central Electrode; P: Parietal Electrode. (XLSX) [file pone.0186221.s003.xlsx]

## Sheet: Novelty P300
The Latency and Amplitude of Novelty P300 in novelty stimuli
Group	Eye condition	Brain region	Latency	Amplitude
1	AE	F	412	6.77
1	AE	F	380	6.28
1	AE	F	332	4.93
1	AE	F	386	7.17
1	AE	F	398	7.46
1	AE	F	430	-0.73
1	AE	F	418	4.85
1	AE	F	370	6.82
1	AE	F	454	-4.88
1	AE	F	388	5.12
1	AE	F	486	-3.02
1	AE	F	440	8.33
1	AE	F	380	6.77
1	AE	F	314	5.82
1	AE	F	443	-2.31
1	AE	F	446	-7.21
1	AE	F	372	8
1	AE	F	342	2.49
1	AE	F	384	6.9
1	AE	F	428	6.04
1	AE	F	400	1.79
1	AE	F	446	-0.7
1	AE	F	376	8.2
1	AE	F	388	13.33
1	AE	F	384	-0.19
1	AE	F	382	7.32
1	AE	F	410	7.37
1	AE	F	416	6.98
1	AE	F	420	2.64
1	AE	F	464	-2.21
1	AE	F	460	7.3
1	AE	F	310	8.14
1	AE	F	422	6.76
1	AE	F	380	8.49
1	AE	F	416	0.98
1	AE	F	460	-1.61
1	AE	F	452	4.78
1	AE	F	374	6.8
1	AE	F	382	6.41
1	AE	F	428	-1.86
1	AE	F	364	8
1	AE	F	470	-1.63
1	AE	F	410	8.3
1	AE	F	458	6.78
1	AE	F	442	-0.04
1	AE	C	438	10.93
1	AE	C	382	10.2
1	AE	C	370	6.15
1	AE	C	390	4.2
1	AE	C	402	11.2
1	AE	C	440	6.31
1	AE	C	408	10.27
1	AE	C	380	8.42
1	AE	C	404	9.94
1	AE	C	388	12.05
1	AE	C	426	7.11
1	AE	C	462	10.54
1	AE	C	378	10.62
1	AE	C	324	11.33
1	AE	C	540	-0.5
1	AE	C	446	8.26
1	AE	C	382	11.22
1	AE	C	336	5.89
1	AE	C	384	14.92
1	AE	C	400	14.19
1	AE	C	396	9.48
1	AE	C	458	8.27
1	AE	C	416	13.2
1	AE	C	388	14.2
1	AE	C	412	8.82
1	AE	C	380	13.2
1	AE	C	456	15.72
1	AE	C	422	12.24
1	AE	C	400	11.9
1	AE	C	460	4.09
1	AE	C	376	14.2
1	AE	C	384	7.83
1	AE	C	340	7.21
1	AE	C	384	11.42
1	AE	C	408	6.35
1	AE	C	422	3.49
1	AE	C	423	7.32
1	AE	C	410	11.81
1	AE	C	384	12.42
1	AE	C	398	7.38
1	AE	C	364	12.23
1	AE	C	384	-2.02
1	AE	C	440	11.09
1	AE	C	458	2.99
1	AE	C	496	-1.04
1	AE	P	430	11.86
1	AE	P	388	12.74
1	AE	P	484	9.84
1	AE	P	422	4.76
1	AE	P	398	10.7
1	AE	P	426	3.94
1	AE	P	386	6.06
1	AE	P	376	-0.44
1	AE	P	406	13.06
1	AE	P	362	5.02
1	AE	P	430	13.75
1	AE	P	488	6.59
1	AE	P	440	3.72
1	AE	P	428	1.93
1	AE	P	354	-9.07
1	AE	P	374	12.75
1	AE	P	384	13.98
1	AE	P	414	13.2
1	AE	P	414	6.84
1	AE	P	404	14.1
1	AE	P	324	14.57
1	AE	P	300	12.3
1	AE	P	412	12.91
1	AE	P	384	13.8
1	AE	P	354	3.94
1	AE	P	376	13.8
1	AE	P	498	12.57
1	AE	P	440	3.9
1	AE	P	402	6.59
1	AE	P	508	-0.29
1	AE	P	318	13.59
1	AE	P	386	4.67
1	AE	P	324	15.75
1	AE	P	410	8.89
1	AE	P	398	6.09
1	AE	P	454	5.79
1	AE	P	312	10.15
1	AE	P	414	4.54
1	AE	P	384	13.38
1	AE	P	360	5.83
1	AE	P	382	11.07
1	AE	P	548	-2.81
1	AE	P	448	4.1
1	AE	P	456	4.56
1	AE	P	502	-2.23
1	DE	F	458	1.04
1	DE	F	460	10.3
1	DE	F	418	10.32
1	DE	F	404	7.42
1	DE	F	430	1.46
1	DE	F	507	0.78
1	DE	F	422	0.7
1	DE	F	395	3.59
1	DE	F	384	9.32
1	DE	F	502	5.15
1	DE	F	366	3.28
1	DE	F	412	11.84
1	DE	F	442	9.04
1	DE	F	438	8.5
1	DE	F	466	1.33
1	DE	F	458	-0.59
1	DE	F	380	9.34
1	DE	F	364	10.71
1	DE	F	414	3.1
1	DE	F	432	-3.91
1	DE	F	480	0.44
1	DE	F	428	-1.58
1	DE	F	354	10.1
1	DE	F	422	0.03
1	DE	F	476	3.16
1	DE	F	372	4.41
1	DE	F	448	10.09
1	DE	F	402	8.03
1	DE	F	448	6.44
1	DE	F	446	-4.79
1	DE	F	456	-1.46
1	DE	F	310	5.5
1	DE	F	354	5.32
1	DE	F	400	7.73
1	DE	F	438	7.9
1	DE	F	465	1.02
1	DE	F	432	2.7
1	DE	F	406	8.13
1	DE	F	430	13.41
1	DE	F	416	2.34
1	DE	F	374	5.03
1	DE	F	446	10.2
1	DE	F	438	9.45
1	DE	F	460	9.32
1	DE	F	444	-0.58
1	DE	C	432	7.6
1	DE	C	488	9.63
1	DE	C	416	8.14
1	DE	C	410	6.27
1	DE	C	446	2.5
1	DE	C	442	-1.76
1	DE	C	308	3.2
1	DE	C	397	10.52
1	DE	C	300	10.5
1	DE	C	422	2.05
1	DE	C	380	9.8
1	DE	C	458	7.89
1	DE	C	446	8.1
1	DE	C	480	5.76
1	DE	C	472	-0.48
1	DE	C	458	7.37
1	DE	C	382	5.59
1	DE	C	366	10.41
1	DE	C	306	3.48
1	DE	C	434	-3.14
1	DE	C	430	-1.53
1	DE	C	420	3.78
1	DE	C	352	9.04
1	DE	C	306	1.36
1	DE	C	418	1.48
1	DE	C	406	8.47
1	DE	C	458	7.05
1	DE	C	442	6.6
1	DE	C	452	8.85
1	DE	C	436	-1.01
1	DE	C	456	6.83
1	DE	C	312	3.54
1	DE	C	358	6.51
1	DE	C	408	9.03
1	DE	C	440	7.46
1	DE	C	426	1.53
1	DE	C	440	3.55
1	DE	C	402	7.35
1	DE	C	420	7.56
1	DE	C	420	-1.73
1	DE	C	450	9.4
1	DE	C	456	6.16
1	DE	C	442	8.69
1	DE	C	470	7.83
1	DE	C	498	-0.92
1	DE	P	420	8.25
1	DE	P	404	7.49
1	DE	P	536	11.34
1	DE	P	408	5.23
1	DE	P	422	-0.73
1	DE	P	424	3.09
1	DE	P	406	5.89
1	DE	P	400	7.29
1	DE	P	396	14.84
1	DE	P	410	1.38
1	DE	P	390	14.85
1	DE	P	440	4.87
1	DE	P	480	5.01
1	DE	P	474	5.26
1	DE	P	390	-4.11
1	DE	P	422	7.74
1	DE	P	362	2.51
1	DE	P	354	6.22
1	DE	P	526	6.23
1	DE	P	416	-9.06
1	DE	P	418	3.68
1	DE	P	448	5.22
1	DE	P	370	7.99
1	DE	P	366	7.47
1	DE	P	366	1.68
1	DE	P	390	13.65
1	DE	P	450	0.91
1	DE	P	428	3.65
1	DE	P	420	8.29
1	DE	P	504	4.24
1	DE	P	420	13.42
1	DE	P	404	6.39
1	DE	P	330	8.35
1	DE	P	404	6.16
1	DE	P	360	5.07
1	DE	P	412	3.89
1	DE	P	400	8.7
1	DE	P	400	3.7
1	DE	P	432	12.08
1	DE	P	344	2.82
1	DE	P	392	11.19
1	DE	P	404	3.46
1	DE	P	446	1.91
1	DE	P	542	3.83
1	DE	P	272	-1.93
1	BA	F	424	3.31
1	BA	F	408	3.09
1	BA	F	404	3.76
1	BA	F	358	2.56
1	BA	F	456	-4.7
1	BA	F	388	3.68
1	BA	F	390	-3.7
1	BA	F	366	2.27
1	BA	F	406	4.06
1	BA	F	496	3.6
1	BA	F	360	-4.2
1	BA	F	434	7.1
1	BA	F	376	3.82
1	BA	F	496	2.28
1	BA	F	476	3.49
1	BA	F	418	-2.31
1	BA	F	520	2.64
1	BA	F	306	-4.99
1	BA	F	376	3.79
1	BA	F	454	-3.69
1	BA	F	390	0.47
1	BA	F	432	-2.97
1	BA	F	352	3
1	BA	F	374	5.24
1	BA	F	366	3.25
1	BA	F	372	7.24
1	BA	F	496	2.22
1	BA	F	376	3.23
1	BA	F	496	2.28
1	BA	F	476	-2.49
1	BA	F	526	-1.11
1	BA	F	334	-1.59
1	BA	F	420	7.41
1	BA	F	432	-3.48
1	BA	F	402	5.75
1	BA	F	546	-2.17
1	BA	F	404	0.79
1	BA	F	320	-4.89
1	BA	F	422	-3.08
1	BA	F	434	8.49
1	BA	F	414	7.04
1	BA	F	480	3.61
1	BA	F	438	-3.71
1	BA	F	490	-1.68
1	BA	F	430	4.6
1	BA	C	423	4.48
1	BA	C	405	8.51
1	BA	C	393	7.2
1	BA	C	361	-2.46
1	BA	C	453	-2.15
1	BA	C	417	1.78
1	BA	C	433	-2.11
1	BA	C	415	3.52
1	BA	C	405	8.79
1	BA	C	495	5.29
1	BA	C	419	-1.37
1	BA	C	441	5.06
1	BA	C	417	7.36
1	BA	C	385	5.51
1	BA	C	385	3.52
1	BA	C	525	-4.1
1	BA	C	425	8.02
1	BA	C	381	1.54
1	BA	C	377	5.08
1	BA	C	449	-2.98
1	BA	C	385	9.38
1	BA	C	397	-2.37
1	BA	C	453	7.2
1	BA	C	395	-3.56
1	BA	C	405	-2.98
1	BA	C	375	1.76
1	BA	C	497	2.77
1	BA	C	367	8.26
1	BA	C	385	3.51
1	BA	C	395	5.52
1	BA	C	391	-1.98
1	BA	C	371	7.65
1	BA	C	421	8.08
1	BA	C	511	-1.38
1	BA	C	373	10.16
1	BA	C	395	-1.29
1	BA	C	413	-4.41
1	BA	C	309	8.43
1	BA	C	405	8.1
1	BA	C	367	-0.81
1	BA	C	389	5.02
1	BA	C	487	-3.53
1	BA	C	355	8.27
1	BA	C	375	1.39
1	BA	C	463	8.3
1	BA	P	391	6.82
1	BA	P	399	8
1	BA	P	405	7.47
1	BA	P	495	4.51
1	BA	P	387	-2.18
1	BA	P	415	8.5
1	BA	P	385	5.81
1	BA	P	429	8.53
1	BA	P	415	8.29
1	BA	P	427	7.03
1	BA	P	395	8.18
1	BA	P	409	0.95
1	BA	P	375	4.02
1	BA	P	491	9.95
1	BA	P	411	-3.56
1	BA	P	403	10
1	BA	P	401	3.66
1	BA	P	389	6.6
1	BA	P	401	2.32
1	BA	P	405	-4.75
1	BA	P	419	1.87
1	BA	P	435	7.84
1	BA	P	405	7.66
1	BA	P	365	-1.36
1	BA	P	355	3.46
1	BA	P	405	10.98
1	BA	P	491	1.47
1	BA	P	395	4.02
1	BA	P	491	9.95
1	BA	P	411	-2.56
1	BA	P	365	9.92
1	BA	P	351	7.96
1	BA	P	437	7.83
1	BA	P	417	-3.35
1	BA	P	389	9.41
1	BA	P	417	2.98
1	BA	P	437	8.01
1	BA	P	407	7.54
1	BA	P	421	10.63
1	BA	P	425	4.3
1	BA	P	403	11.57
1	BA	P	353	8.36
1	BA	P	331	2.67
1	BA	P	387	0.99
1	BA	P	391	-7.35
2	ND	F	374	8.14
2	ND	F	358	-2.76
2	ND	F	514	0.01
2	ND	F	419	-2.2
2	ND	F	506	3.4
2	ND	F	474	-0.11
2	ND	F	346	7.34
2	ND	F	370	3.89
2	ND	F	316	7.44
2	ND	F	482	-2.55
2	ND	F	330	2.39
2	ND	F	368	1.7
2	ND	F	382	-0.49
2	ND	F	286	-2.22
2	ND	F	502	0.82
2	ND	F	494	-4
2	ND	F	354	4.78
2	ND	F	378	4.88
2	ND	F	330	7.52
2	ND	F	508	0.27
2	ND	F	404	10.66
2	ND	F	386	-1.36
2	ND	F	476	2.95
2	ND	F	366	-1.72
2	ND	F	516	2.95
2	ND	F	440	-4.02
2	ND	F	438	-5.1
2	ND	F	338	-6.75
2	ND	F	318	7.85
2	ND	F	524	-5.06
2	ND	C	376	13.22
2	ND	C	396	7.5
2	ND	C	518	3.9
2	ND	C	504	2.27
2	ND	C	512	9.88
2	ND	C	392	5.79
2	ND	C	348	11.96
2	ND	C	370	12.18
2	ND	C	368	10.36
2	ND	C	432	-4.94
2	ND	C	344	6.31
2	ND	C	380	10.17
2	ND	C	400	5.14
2	ND	C	386	1.38
2	ND	C	480	0.35
2	ND	C	396	3.52
2	ND	C	356	12.35
2	ND	C	378	13.86
2	ND	C	348	10.54
2	ND	C	496	5.6
2	ND	C	404	19.35
2	ND	C	386	7.36
2	ND	C	478	5.97
2	ND	C	280	9.43
2	ND	C	376	3.9
2	ND	C	380	6.71
2	ND	C	356	3.1
2	ND	C	524	-6.37
2	ND	C	378	15.22
2	ND	C	480	-1.07
2	ND	P	377	16.62
2	ND	P	397	8.15
2	ND	P	517	4.29
2	ND	P	497	2.03
2	ND	P	513	9.83
2	ND	P	363	3.57
2	ND	P	385	7.25
2	ND	P	379	8.45
2	ND	P	393	16.75
2	ND	P	383	1.95
2	ND	P	365	8.67
2	ND	P	383	10.37
2	ND	P	403	6.1
2	ND	P	350	6.07
2	ND	P	501	1.21
2	ND	P	421	2.67
2	ND	P	395	3.96
2	ND	P	381	14.91
2	ND	P	375	14.9
2	ND	P	503	10.25
2	ND	P	401	18.62
2	ND	P	389	7.87
2	ND	P	475	5.86
2	ND	P	369	5.66
2	ND	P	499	5.21
2	ND	P	379	2.37
2	ND	P	363	8.58
2	ND	P	381	17.37
2	ND	P	387	21.25
2	ND	P	379	2.92
2	DE	F	344	12.41
2	DE	F	378	5.01
2	DE	F	458	1.89
2	DE	F	450	1.3
2	DE	F	502	-2.96
2	DE	F	518	-2.29
2	DE	F	332	-0.22
2	DE	F	336	12.25
2	DE	F	308	3.43
2	DE	F	428	-6.19
2	DE	F	300	15.22
2	DE	F	516	-6.72
2	DE	F	454	-1.89
2	DE	F	356	-5.17
2	DE	F	524	1.43
2	DE	F	338	0.91
2	DE	F	384	-0.15
2	DE	F	358	1.92
2	DE	F	324	15.77
2	DE	F	374	-4.02
2	DE	F	504	0.1
2	DE	F	400	-0.36
2	DE	F	418	7.71
2	DE	F	308	-6.79
2	DE	F	472	1.43
2	DE	F	504	-4.37
2	DE	F	498	-4.9
2	DE	F	376	2.39
2	DE	F	322	7.02
2	DE	F	316	-4.84
2	DE	C	368	12.58
2	DE	C	416	3.82
2	DE	C	418	1.87
2	DE	C	418	0.92
2	DE	C	410	3.66
2	DE	C	380	-1.57
2	DE	C	366	11.53
2	DE	C	400	17.95
2	DE	C	370	4.15
2	DE	C	416	-2.21
2	DE	C	322	15.84
2	DE	C	254	1.84
2	DE	C	406	-2.21
2	DE	C	422	-0.44
2	DE	C	546	2.95
2	DE	C	392	9.07
2	DE	C	408	6.46
2	DE	C	400	8.42
2	DE	C	394	20.15
2	DE	C	400	-0.46
2	DE	C	492	0.87
2	DE	C	424	3.97
2	DE	C	440	7.27
2	DE	C	426	-1.74
2	DE	C	418	3.94
2	DE	C	400	2.88
2	DE	C	394	4.59
2	DE	C	397	6.67
2	DE	C	398	9.16
2	DE	C	442	-0.3
2	DE	P	382	6.87
2	DE	P	326	3.39
2	DE	P	412	1.13
2	DE	P	412	0.01
2	DE	P	406	3.36
2	DE	P	394	-3.19
2	DE	P	384	12.35
2	DE	P	396	4.81
2	DE	P	508	7.34
2	DE	P	406	-0.12
2	DE	P	312	11.81
2	DE	P	334	0.17
2	DE	P	410	-1.03
2	DE	P	428	1.36
2	DE	P	424	2.9
2	DE	P	384	11.15
2	DE	P	354	22.08
2	DE	P	402	8.17
2	DE	P	416	14.72
2	DE	P	396	2.21
2	DE	P	484	-2.23
2	DE	P	416	3.86
2	DE	P	434	7.08
2	DE	P	284	-4.57
2	DE	P	412	3.93
2	DE	P	520	3.05
2	DE	P	406	10.73
2	DE	P	386	5.76
2	DE	P	416	12.45
2	DE	P	540	0.67
2	BC	F	302	11.5
2	BC	F	348	-3.46
2	BC	F	364	4.52
2	BC	F	522	-2.1
2	BC	F	514	-2.02
2	BC	F	328	-1.78
2	BC	F	498	0.03
2	BC	F	348	9.11
2	BC	F	324	2.24
2	BC	F	414	3.93
2	BC	F	306	9.97
2	BC	F	462	3.64
2	BC	F	438	3.66
2	BC	F	508	-6.18
2	BC	F	504	2.45
2	BC	F	494	-4.3
2	BC	F	420	-8.26
2	BC	F	324	10.37
2	BC	F	312	1.19
2	BC	F	308	-2.8
2	BC	F	304	8.99
2	BC	F	378	8.92
2	BC	F	376	3.3
2	BC	F	306	-5.41
2	BC	F	490	4.17
2	BC	F	416	1.32
2	BC	F	498	-2.32
2	BC	F	324	5.96
2	BC	F	318	2.14
2	BC	F	516	1.94
2	BC	C	344	11.85
2	BC	C	408	1.44
2	BC	C	408	8.23
2	BC	C	512	-0.43
2	BC	C	404	3.49
2	BC	C	374	0.55
2	BC	C	390	4.39
2	BC	C	392	8.37
2	BC	C	308	4.5
2	BC	C	492	9.4
2	BC	C	330	9.72
2	BC	C	408	0.82
2	BC	C	498	5.72
2	BC	C	304	-2.31
2	BC	C	406	7.33
2	BC	C	446	3.39
2	BC	C	418	-1.03
2	BC	C	394	14.97
2	BC	C	332	4.69
2	BC	C	427	-0.9
2	BC	C	344	8.39
2	BC	C	416	5.42
2	BC	C	422	8.6
2	BC	C	422	-3.17
2	BC	C	406	4.78
2	BC	C	390	9.05
2	BC	C	496	-3.33
2	BC	C	406	11.78
2	BC	C	340	4.71
2	BC	C	486	3.67
2	BC	P	328	7.41
2	BC	P	392	2.57
2	BC	P	388	5.27
2	BC	P	542	0.58
2	BC	P	390	5.33
2	BC	P	428	1.53
2	BC	P	372	8.9
2	BC	P	454	1.06
2	BC	P	386	12.78
2	BC	P	476	8.15
2	BC	P	370	7.55
2	BC	P	392	1.99
2	BC	P	402	4.12
2	BC	P	440	-3.63
2	BC	P	390	7.19
2	BC	P	414	4.04
2	BC	P	370	13.18
2	BC	P	464	3.71
2	BC	P	394	12.6
2	BC	P	410	4.46
2	BC	P	378	6.37
2	BC	P	394	5.17
2	BC	P	474	5.02
2	BC	P	404	0.32
2	BC	P	390	6.78
2	BC	P	420	1.92
2	BC	P	374	12.88
2	BC	P	398	6.03
2	BC	P	394	15.92
2	BC	P	390	8.88
(Group 1:Anisometropic Amblyopes; Group 2: Normal Controls;AE: Amblyopic Eye; FE: Fellow eye; BA: Binoculus in Amblyopia; ND: Non-dominant Eye; DE: Dominant Eye; BC: Binoculus in Control;F: Frontal Electrode; C: Central Electrode; P: Parietal Electrode)
